# Supplementary material for: Hybrid Quinoline-Thiosemicarbazone Therapeutics as a New Treatment Opportunity for Alzheimer’s Disease‒Synthesis, In Vitro Cholinesterase Inhibitory Potential and Computational Modeling Analysis
Source: MDPI journal article supplement (doi:10.3390/molecules26216573), 2021-10-30
Supplement: s1 [file s1]

## *Supporting Information*

### **Hybrid Quinoline-Thiosemicarbazone Therapeutics as a New Treatment Opportunity for Alzheimer's Disease – Synthesis, In Vitro Cholinesterase Inhibitory Potential and Computational Modeling Analysis**

Sumera Zaib <sup>1,\*</sup>, Rubina Munir <sup>2,\*</sup>, Muhammad Tayyab Younas <sup>1</sup>, Naghmana Kausar <sup>3</sup>, Aliya Ibrar <sup>4</sup>, Sehar Aqsa <sup>2</sup>, Noorma Shahid <sup>2</sup>, Tahira Tasneem Asif <sup>2</sup>, Hashem O. Alsaab <sup>5</sup> and Imtiaz Khan <sup>6,\*</sup>

<sup>1</sup>*Department of Biochemistry, Faculty of Life Sciences, University of Central Punjab, Lahore 54590, Pakistan; muhammادتayyabyounassst@gmail.com (M.T.Y.)*

<sup>2</sup>*Department of Chemistry, Kinnaird College for Women, Lahore 54000, Pakistan; w14bche002@gmail.com (S.A.); tahiratasneem1998@gmail.com (T.T.A.)*

<sup>3</sup>*Department of Chemistry, University of Gujrat, Gujrat 50700, Pakistan; naghmana.kousar@uog.edu.pk (N.K.)*

<sup>4</sup>*Department of Chemistry, Faculty of Natural Sciences, The University of Haripur, Haripur, KPK 22620, Pakistan; aliya.ibrar@uoh.edu.pk (A.I.)*

<sup>5</sup>*Department of Pharmaceutics and Pharmaceutical Technology, Taif University, P.O. Box 11099, Taif 21944, Saudi Arabia; h.alsaab@tu.edu.sa (H.O.A.)*

<sup>6</sup>*Department of Chemistry and Manchester Institute of Biotechnology, The University of Manchester, 131 Princess Street, Manchester M1 7DN, UK*

**\*Correspondence:** sumera.zaib@ucp.edu.pk (S.Z.); rubina.munir@kinnaird.edu.pk (R.M.); imtiaz.khan@manchester.ac.uk (I.K.)

## Supporting Information

### NMR spectra of quinoline-thiosemicarbazones 5(a-k)

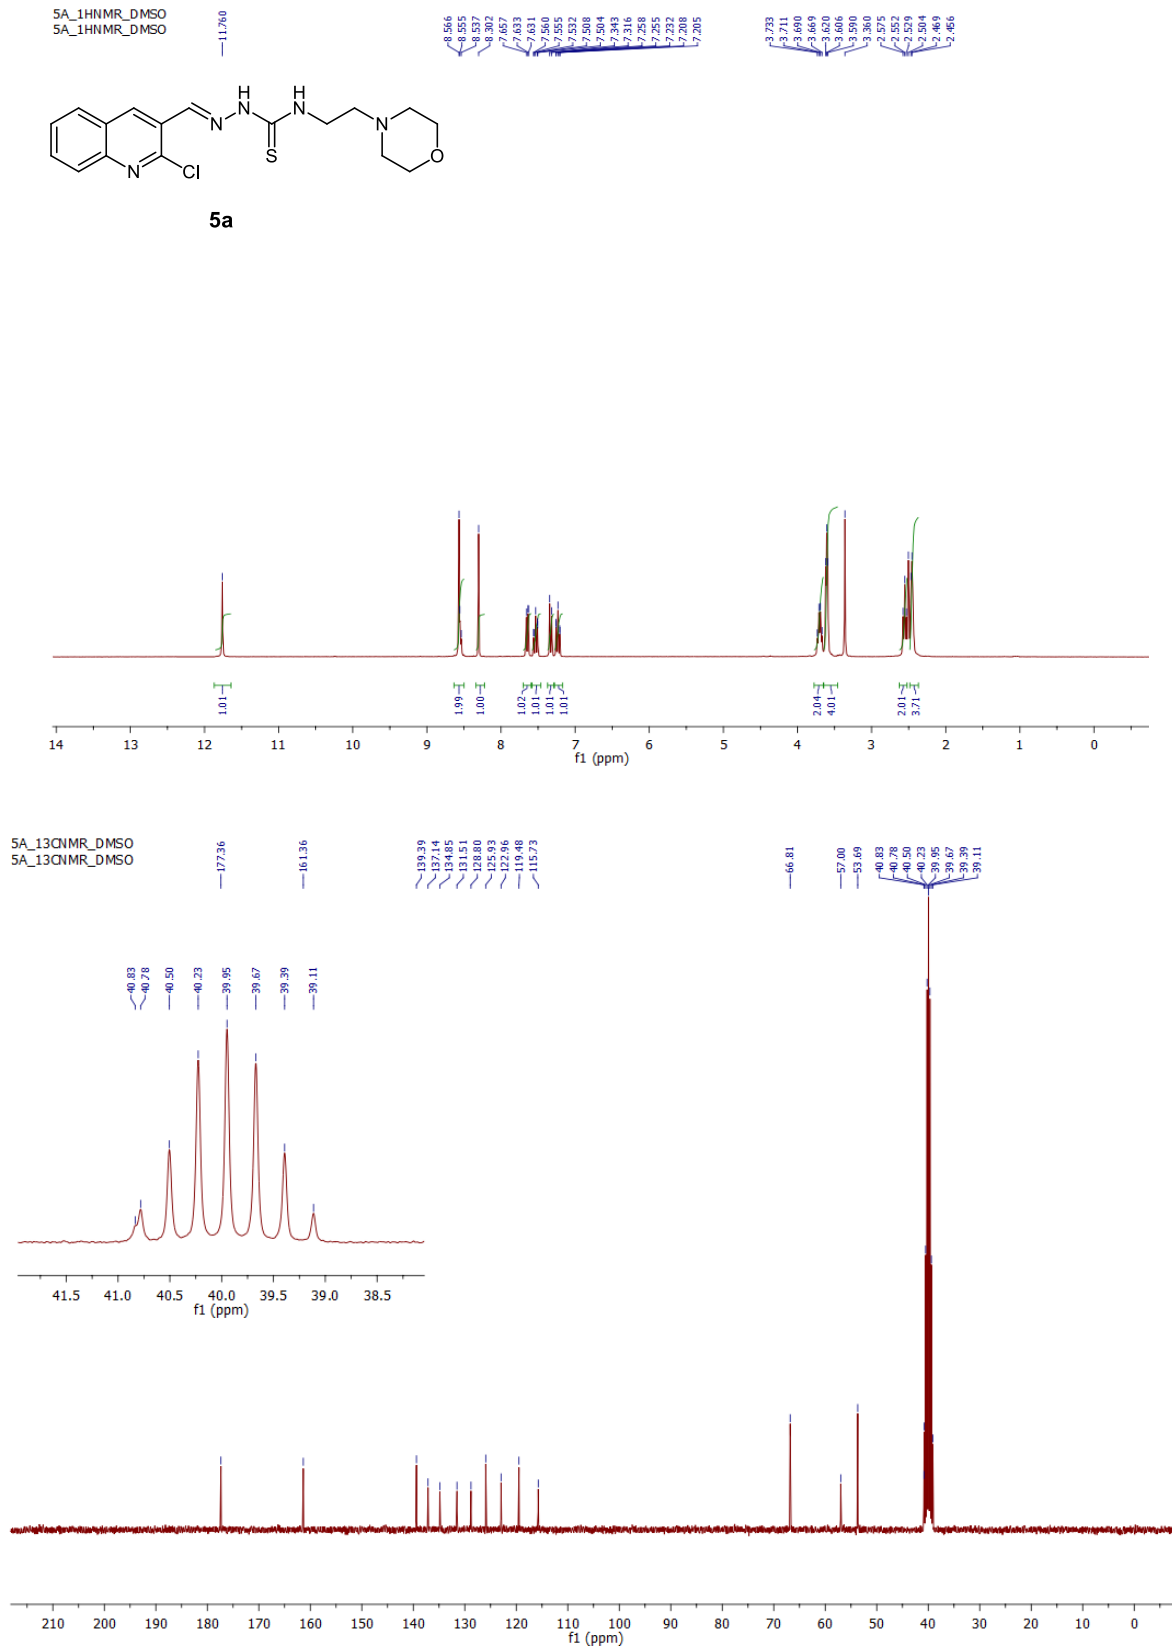

# Supporting Information

5b\_1HNMR\_DMSO  
5b\_1HNMR\_DMSO

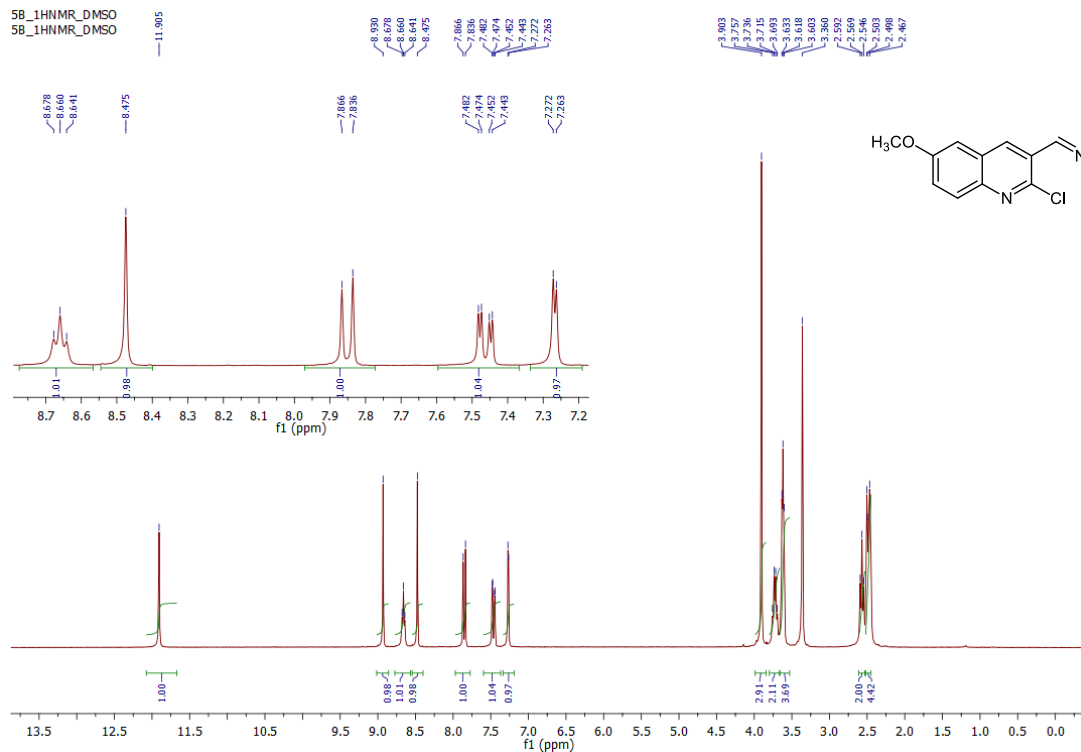

5b\_13CNMR\_DMSO  
5b\_13CNMR\_DMSO

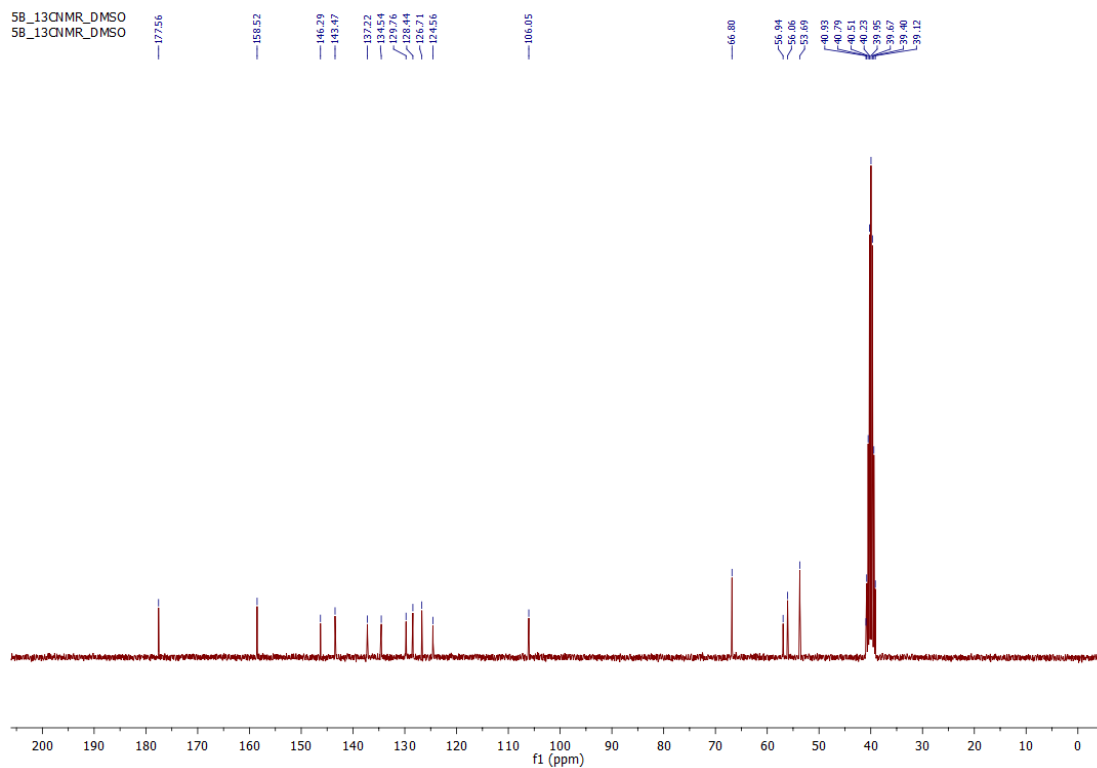

# Supporting Information

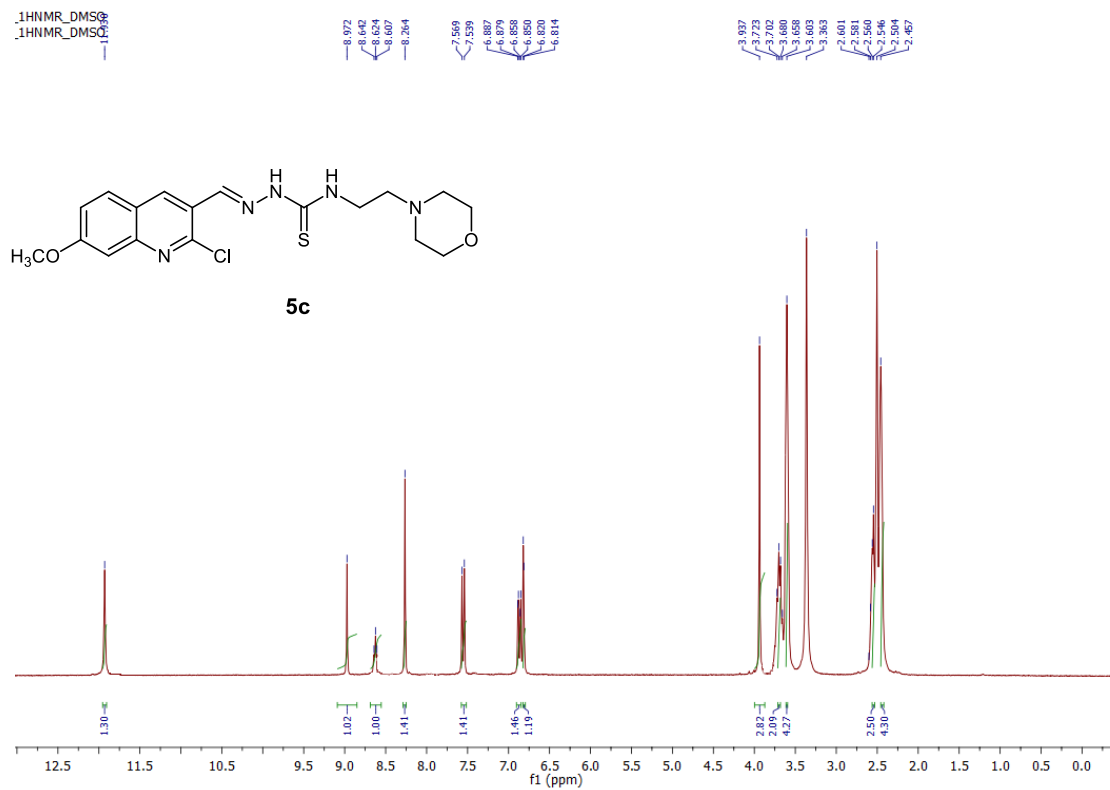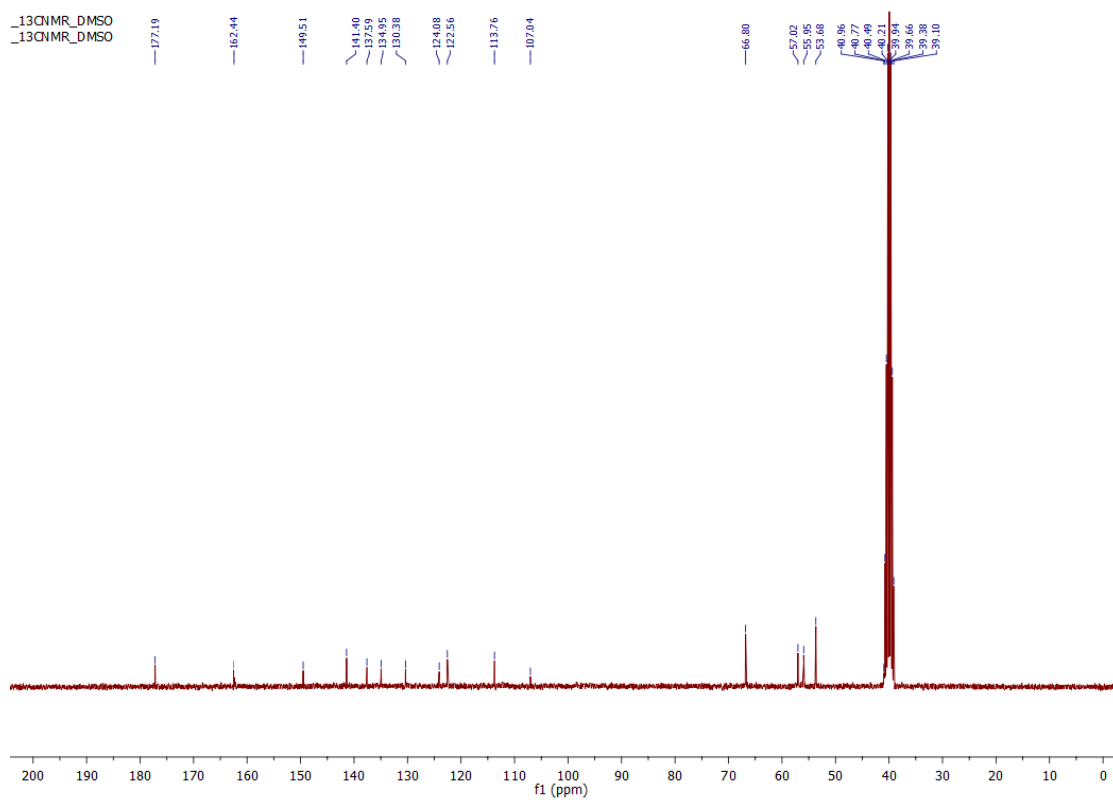

# Supporting Information

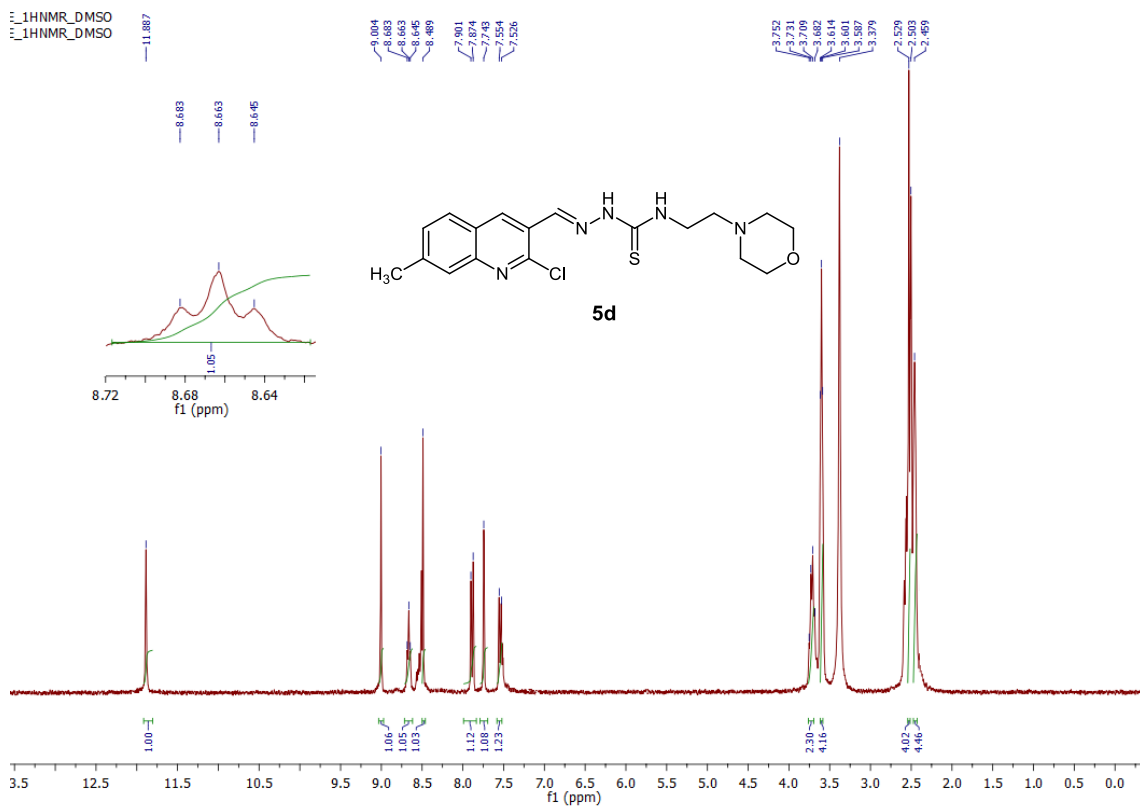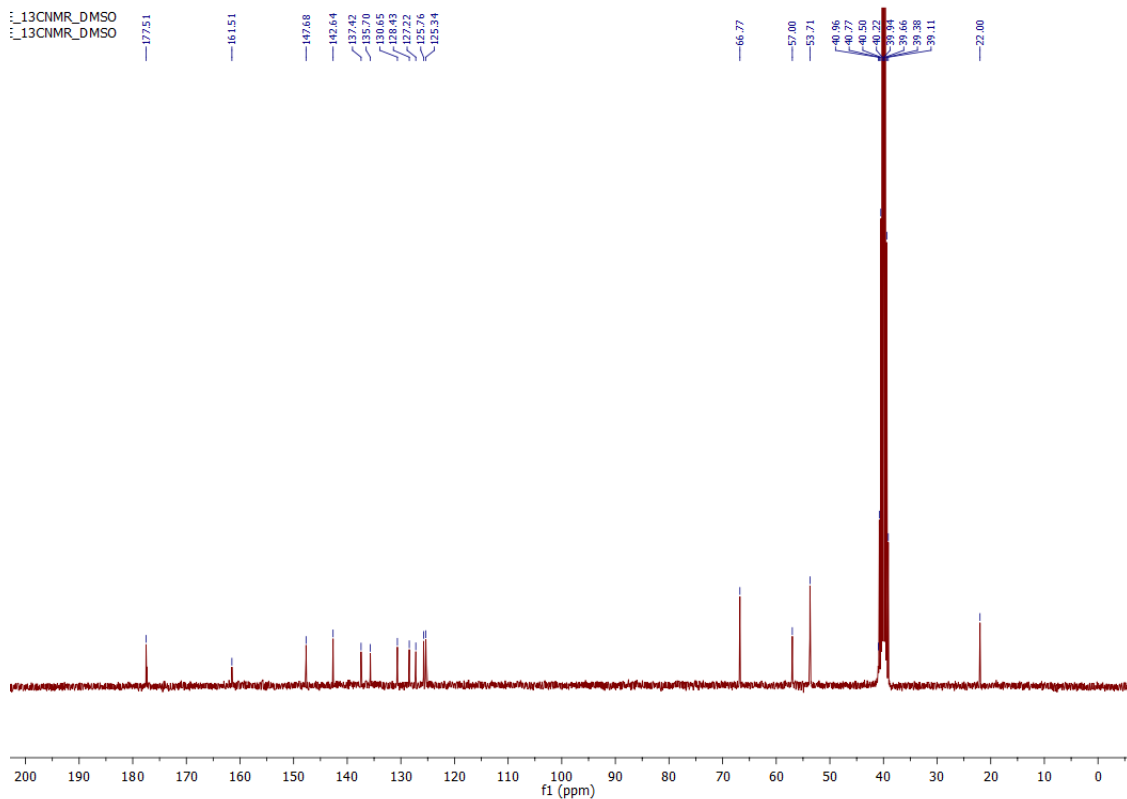

# Supporting Information

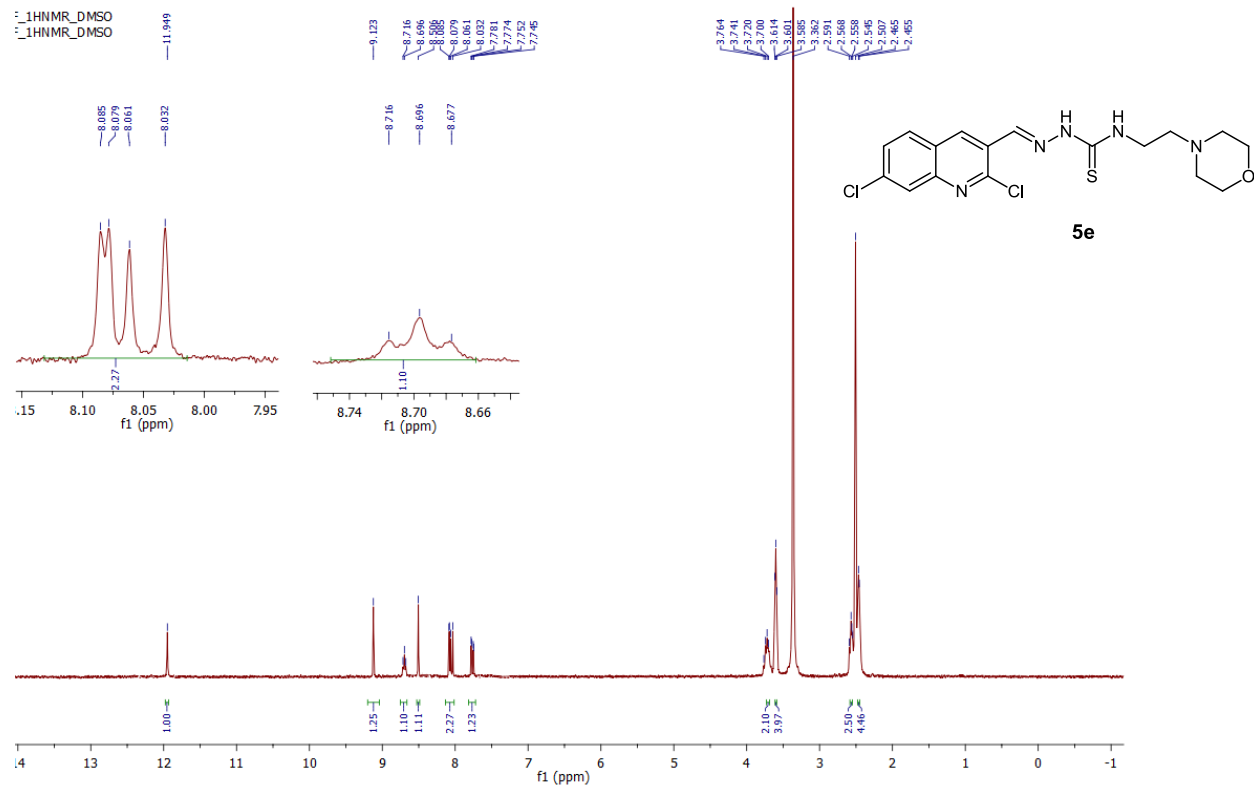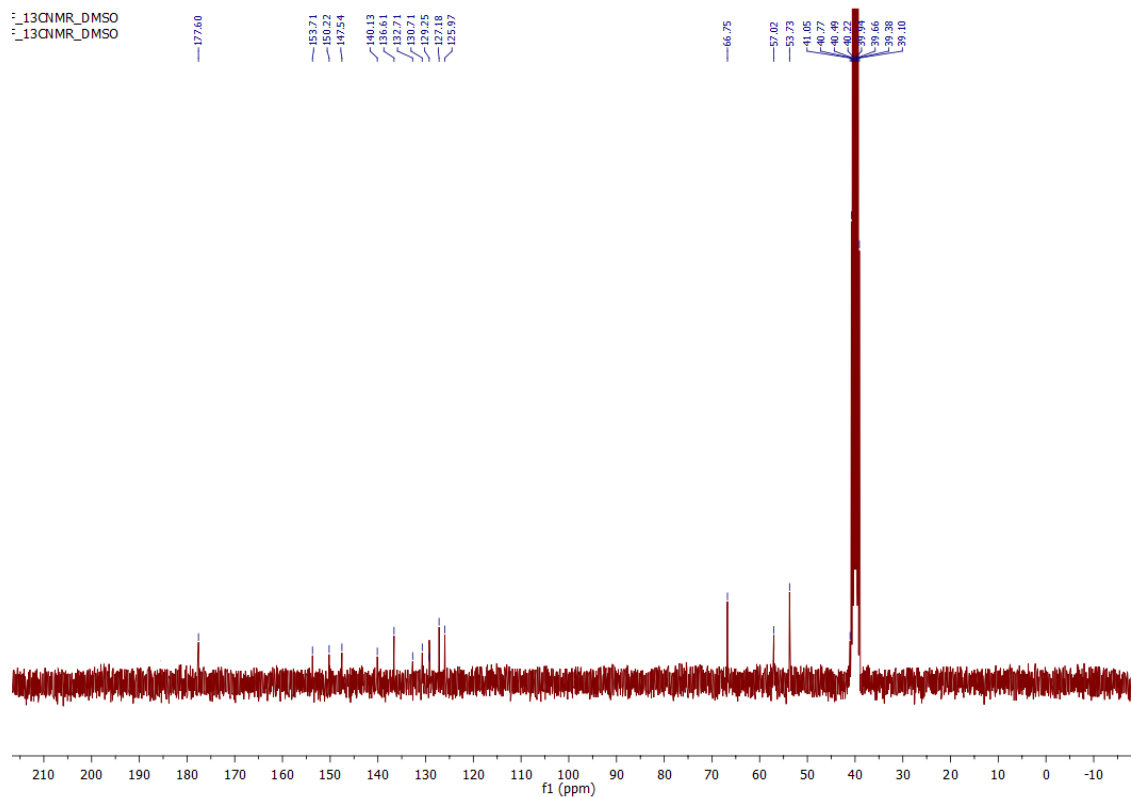

# Supporting Information

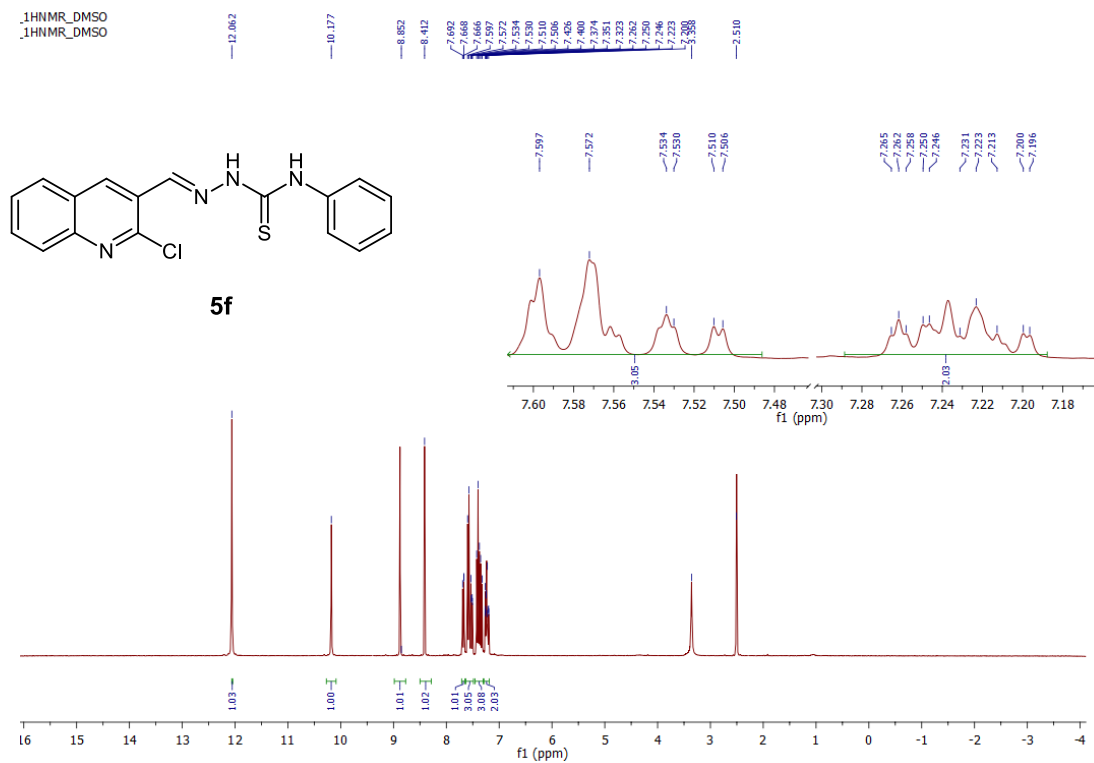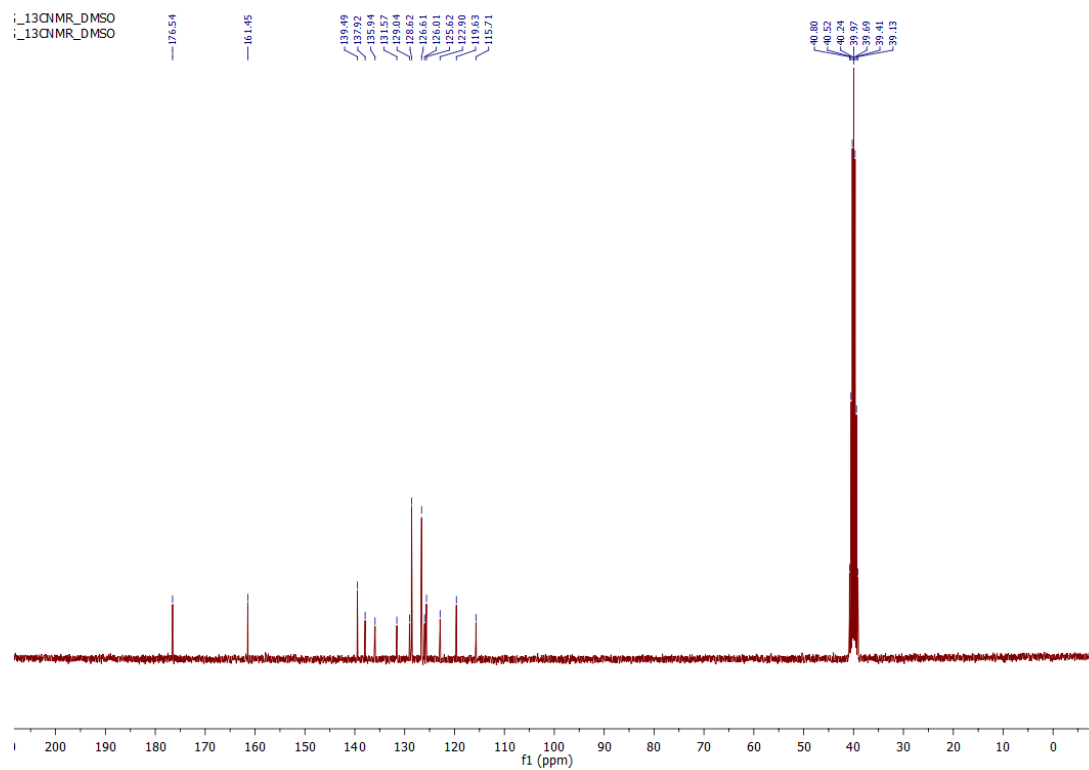

## Supporting Information

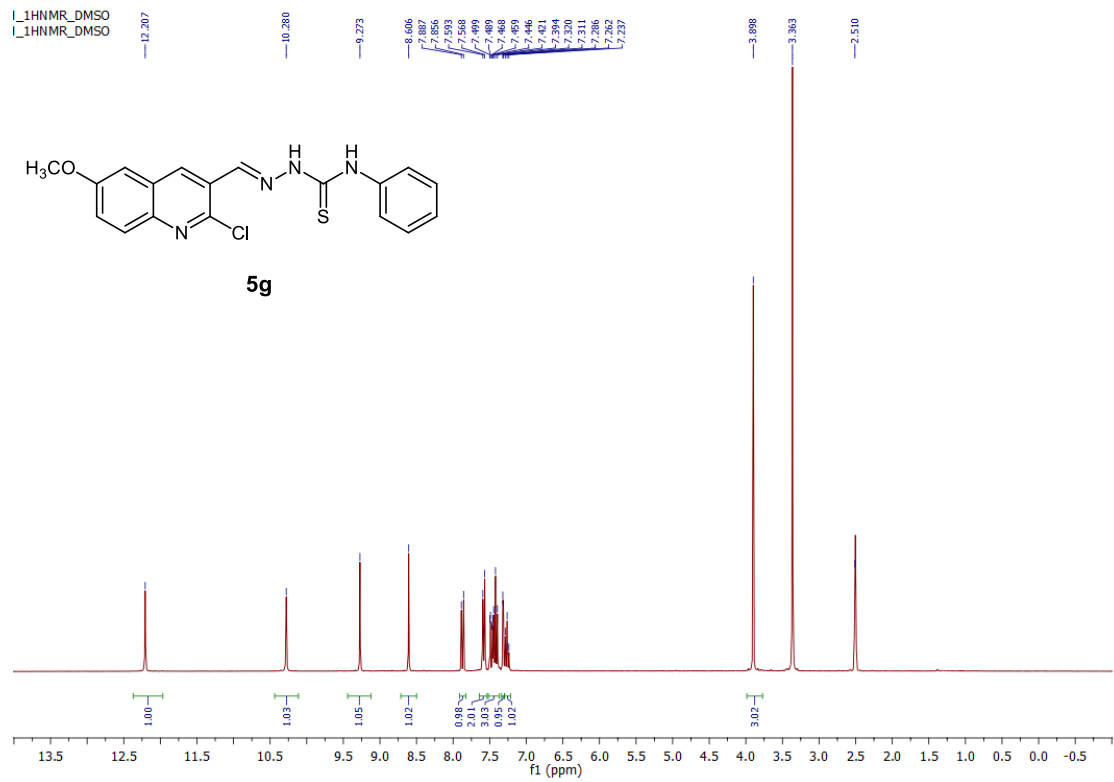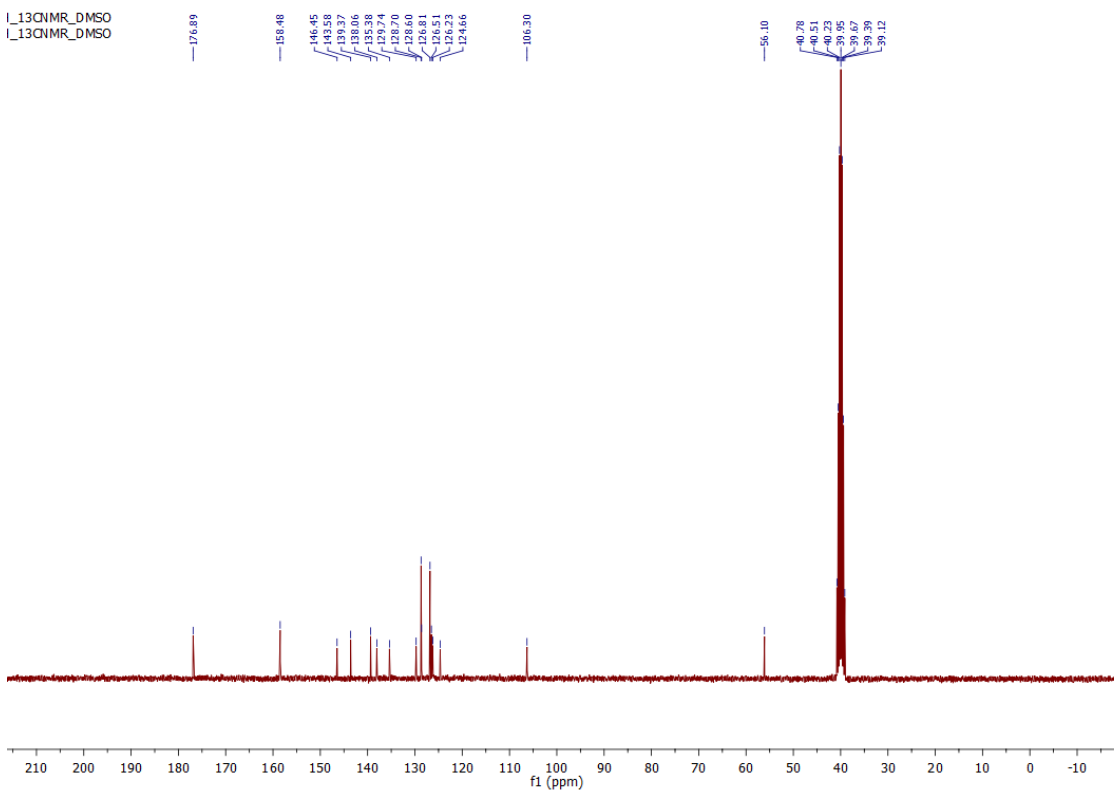



## Supporting Information

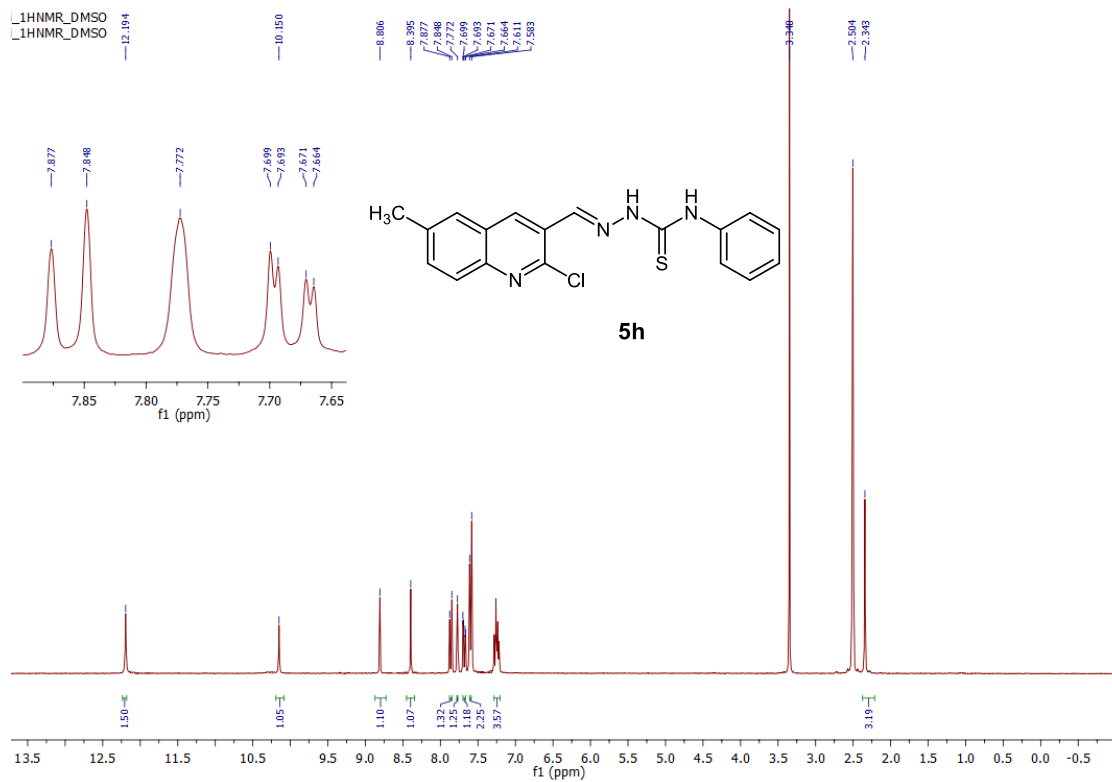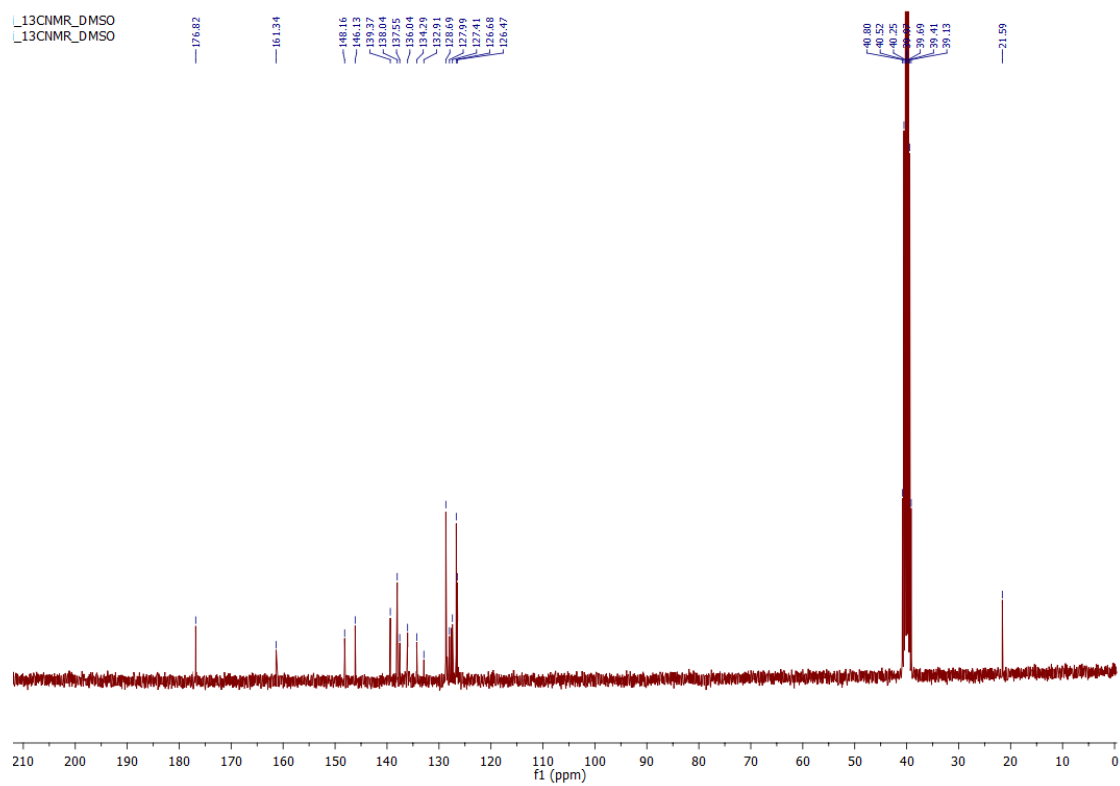

## Supporting Information

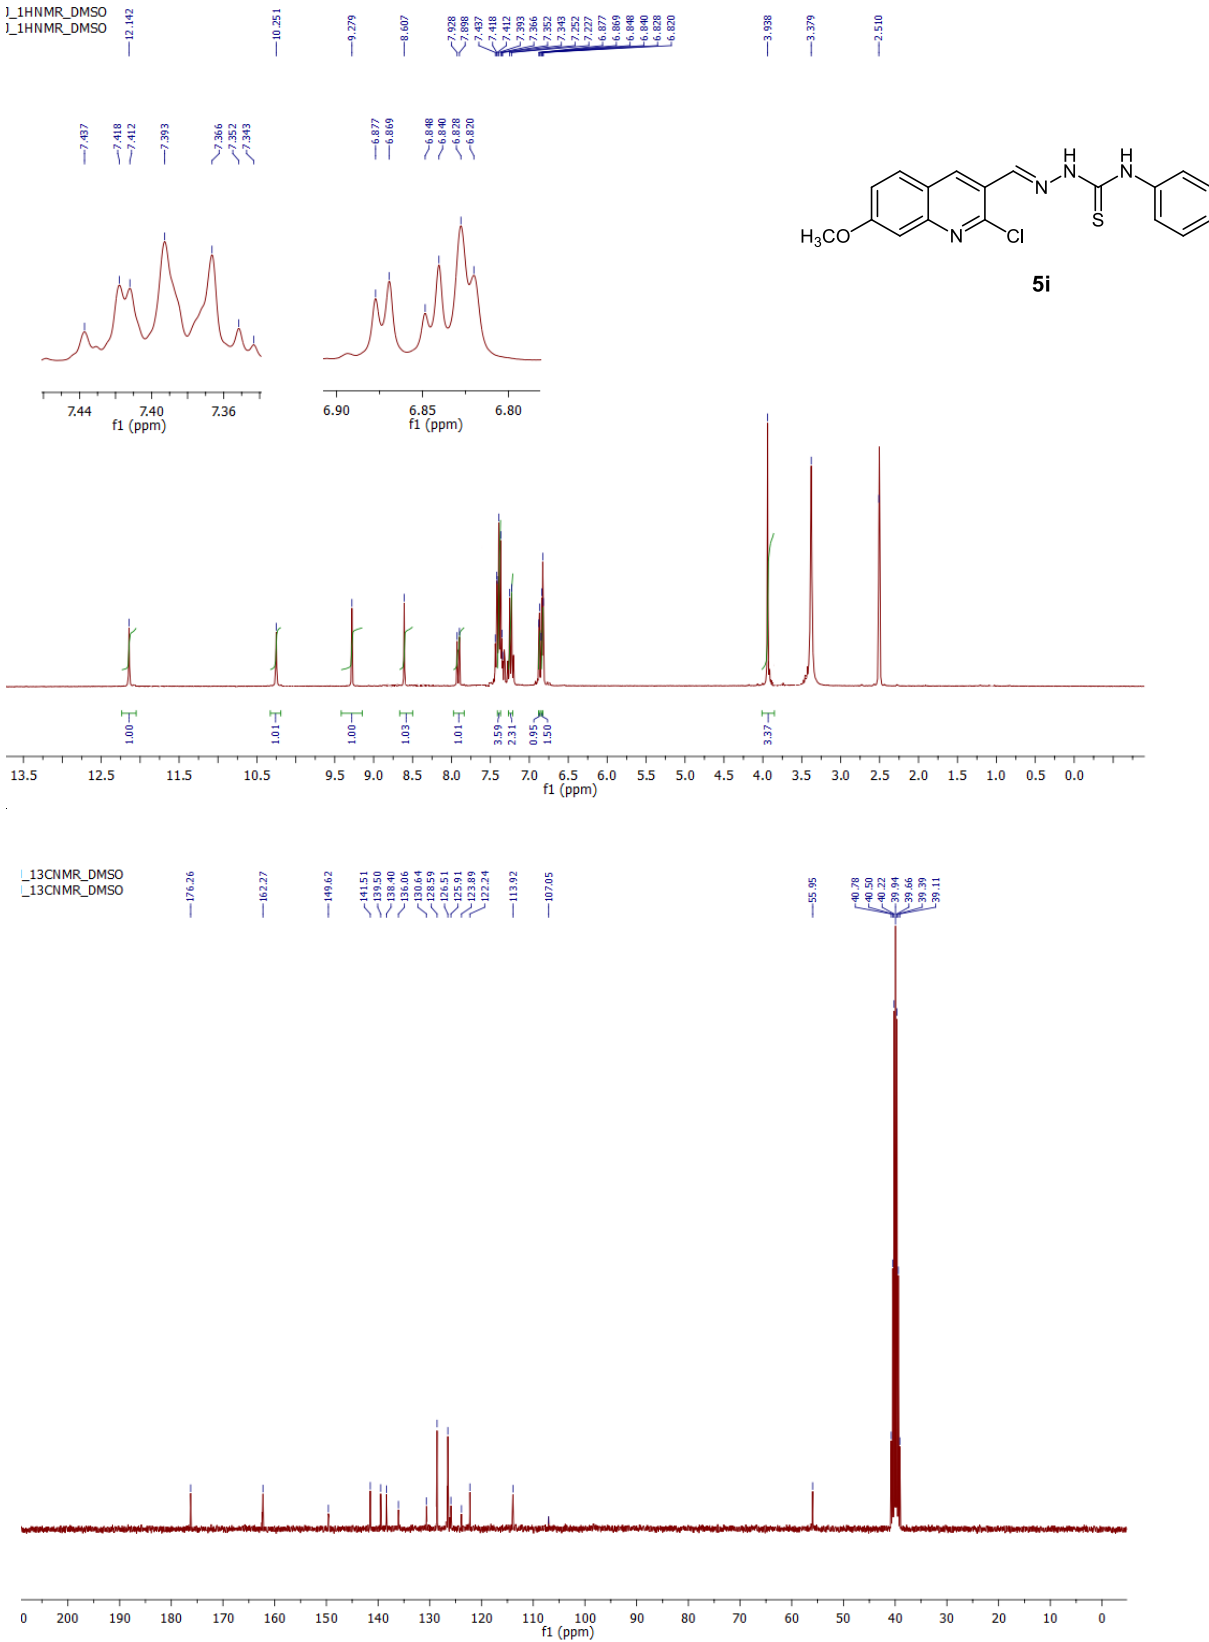

# Supporting Information

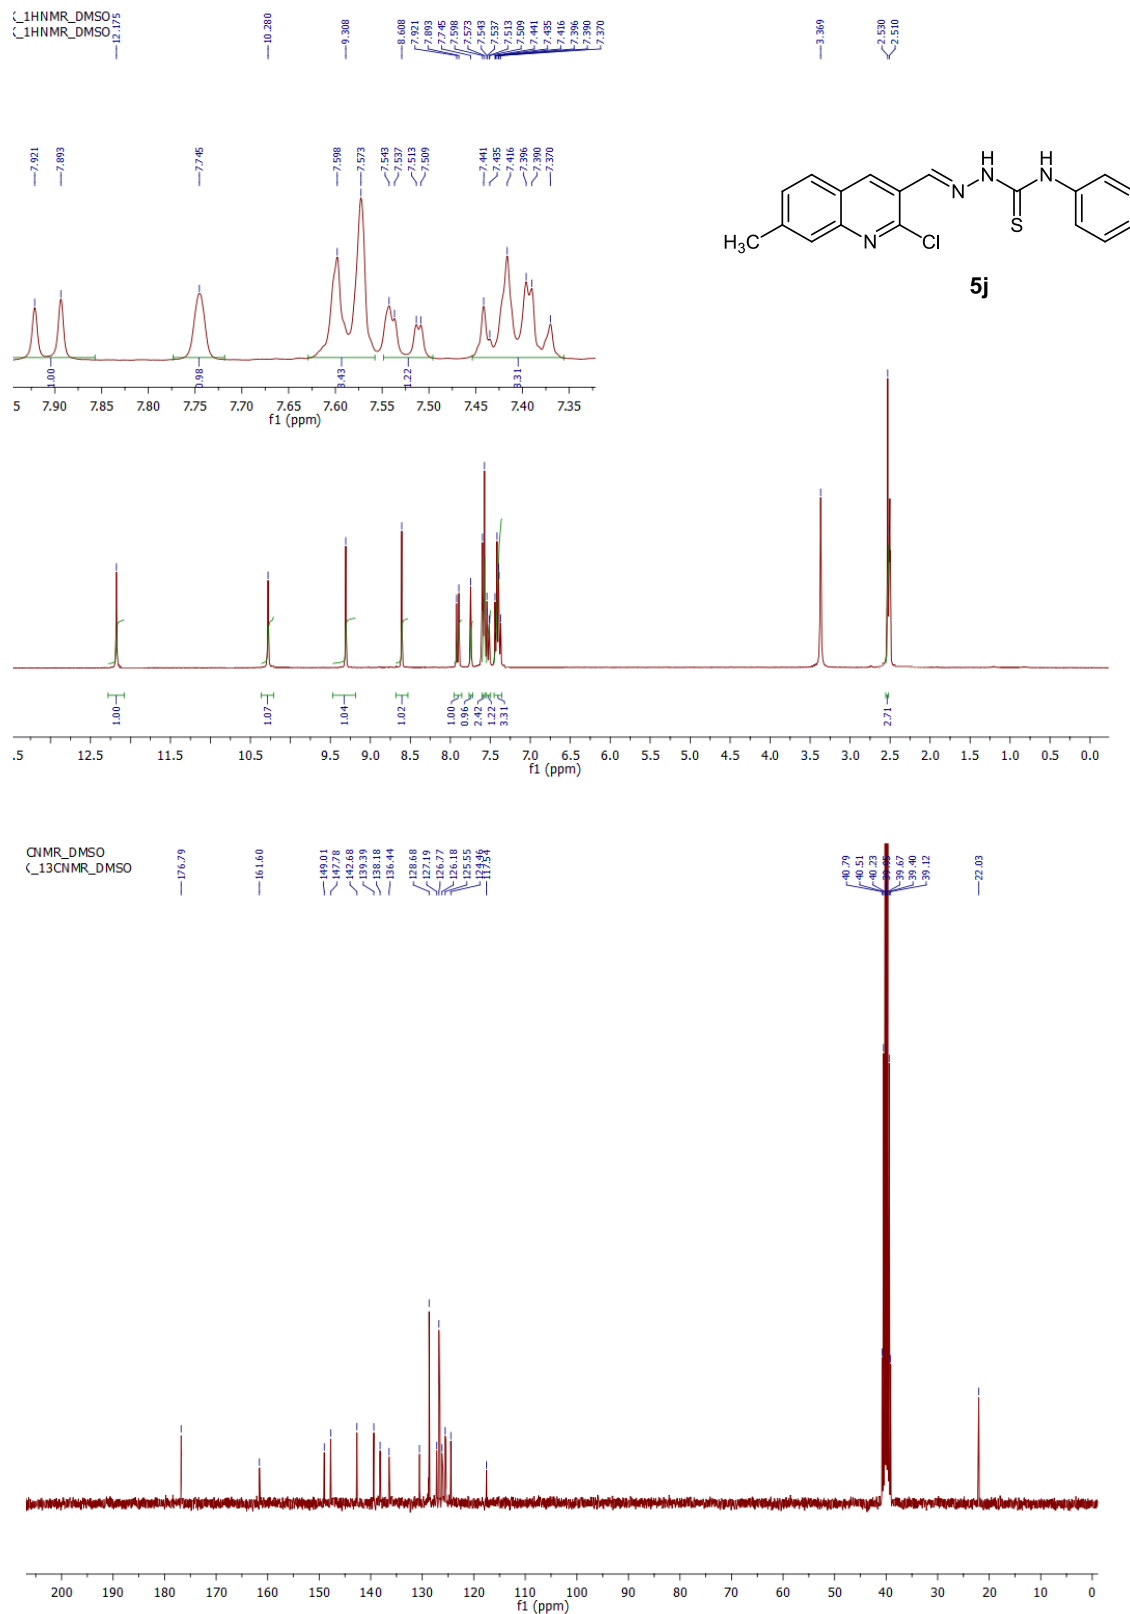

# Supporting Information

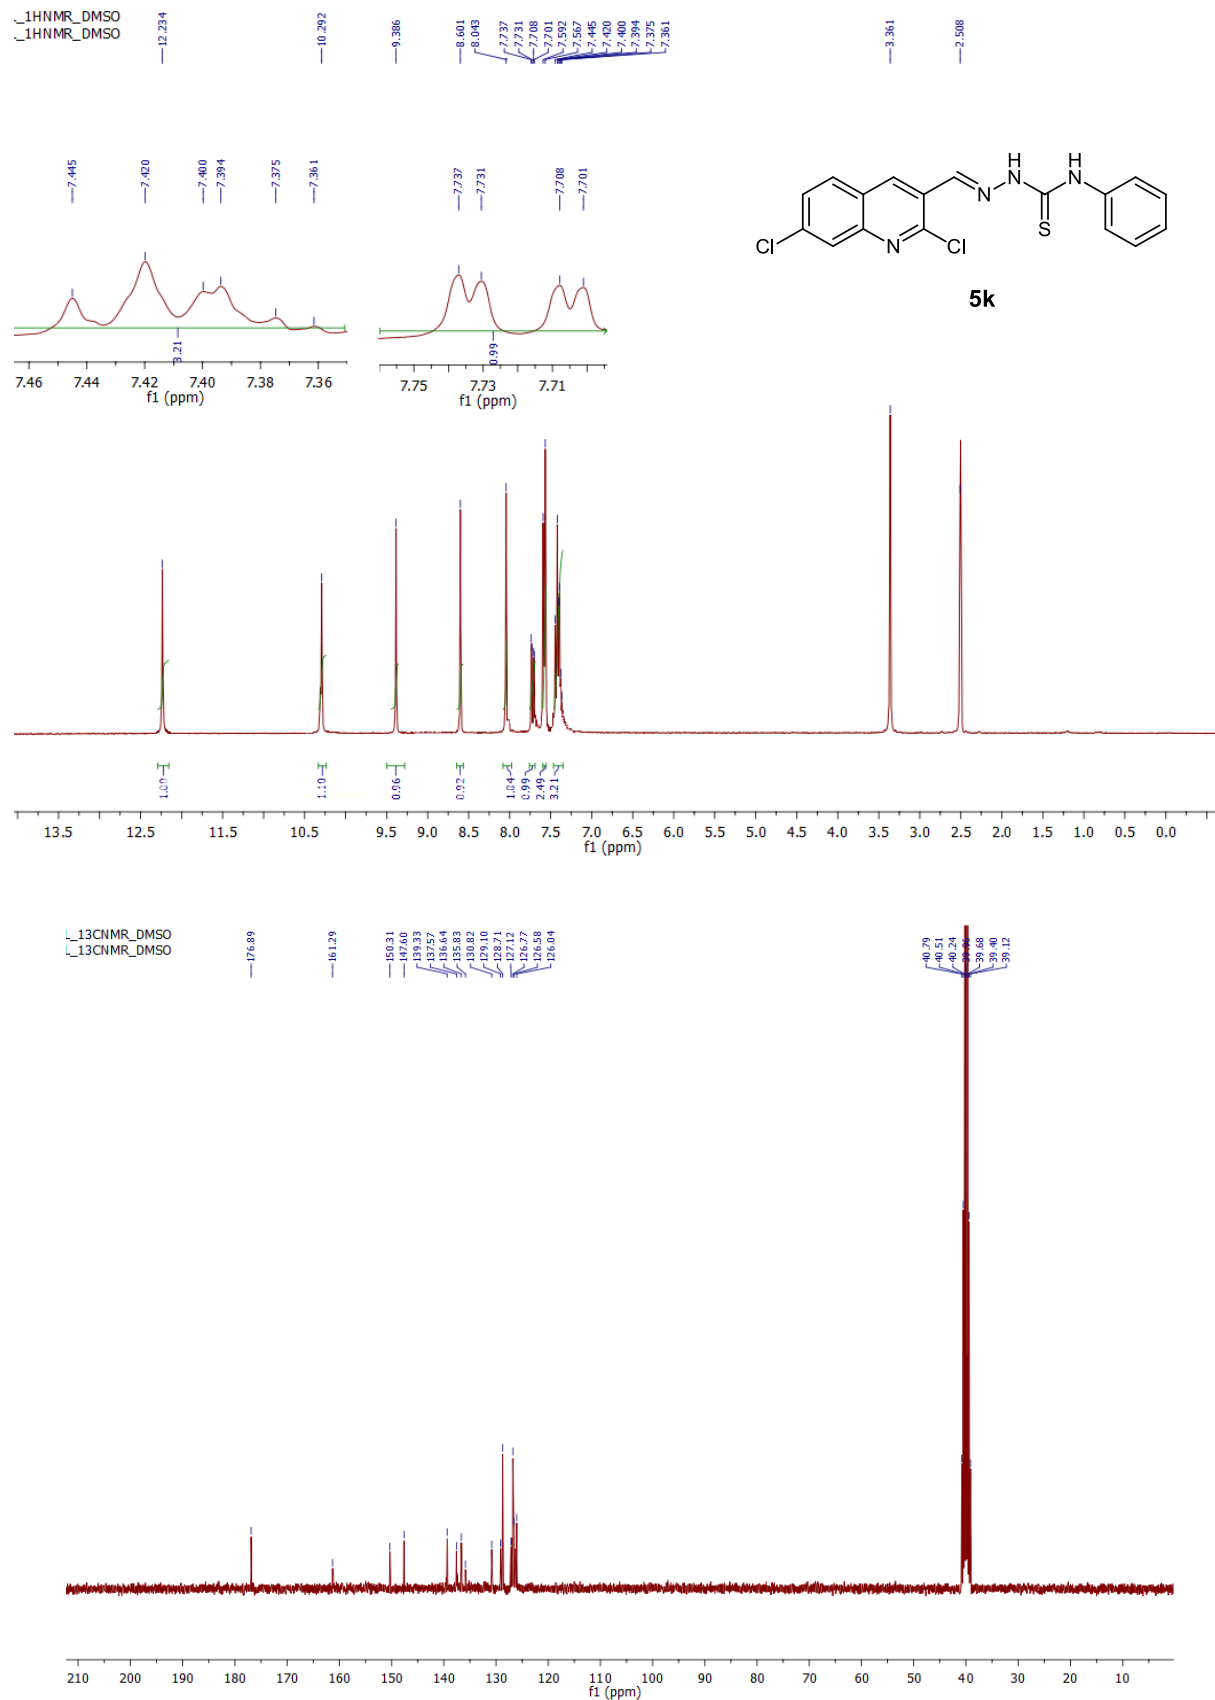

## Supporting Information

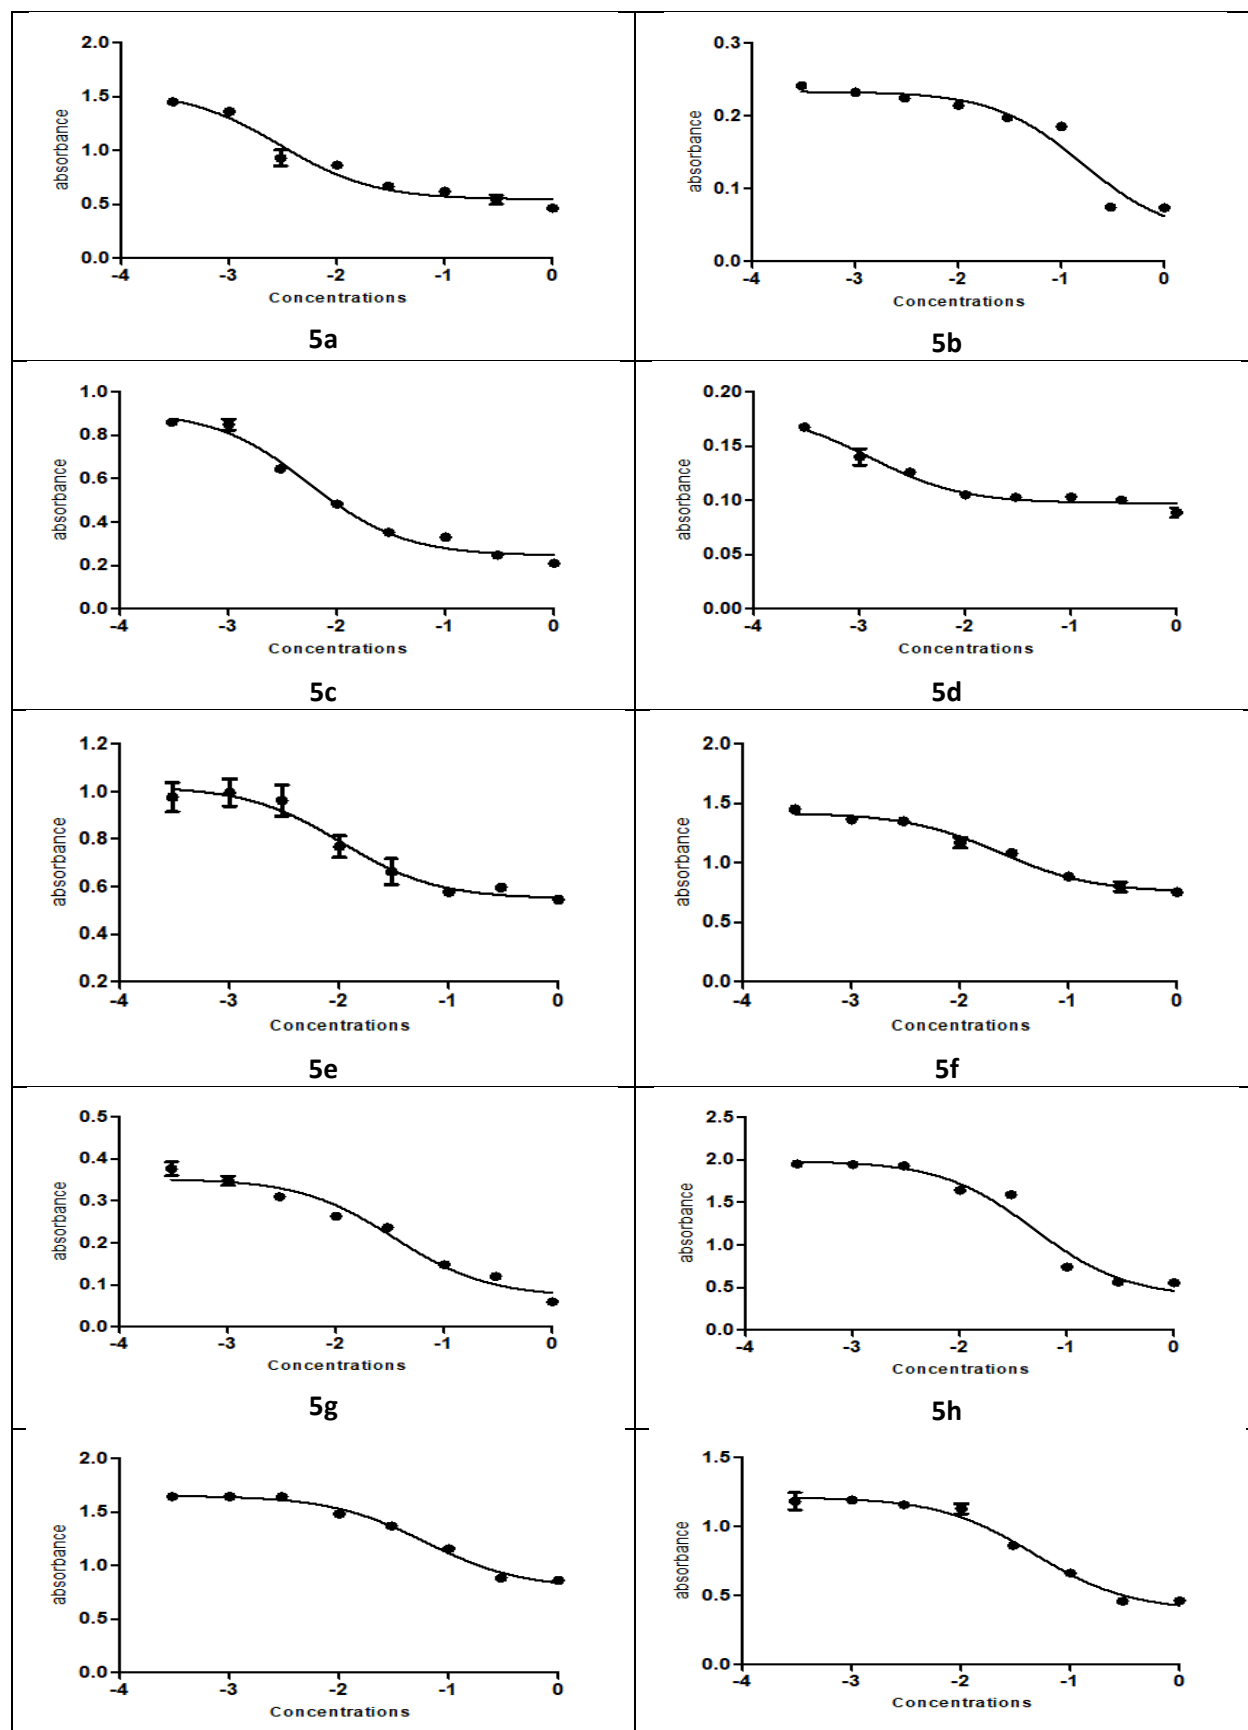

## Supporting Information

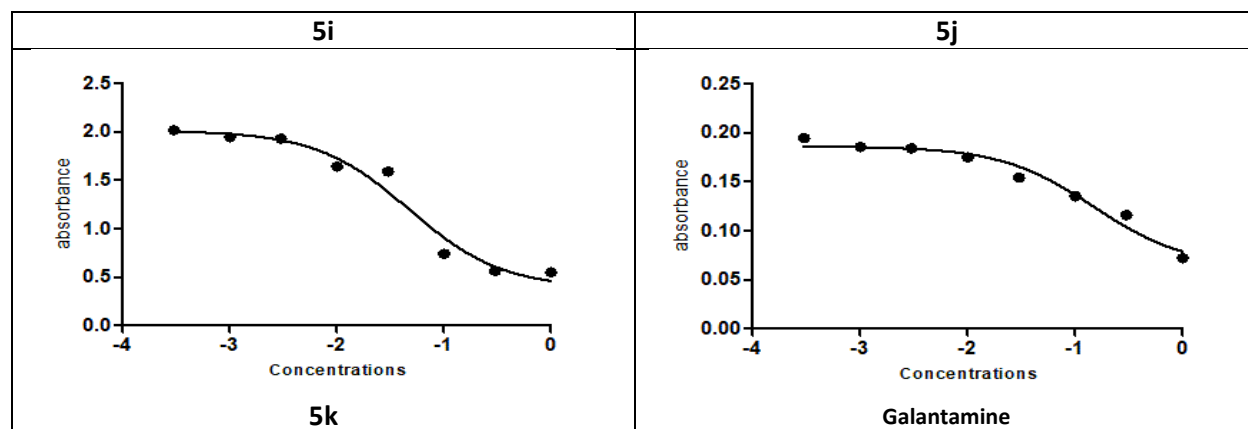

**Figure S1.** Dose response curves for enzyme inhibition activity (AChE)

## Supporting Information

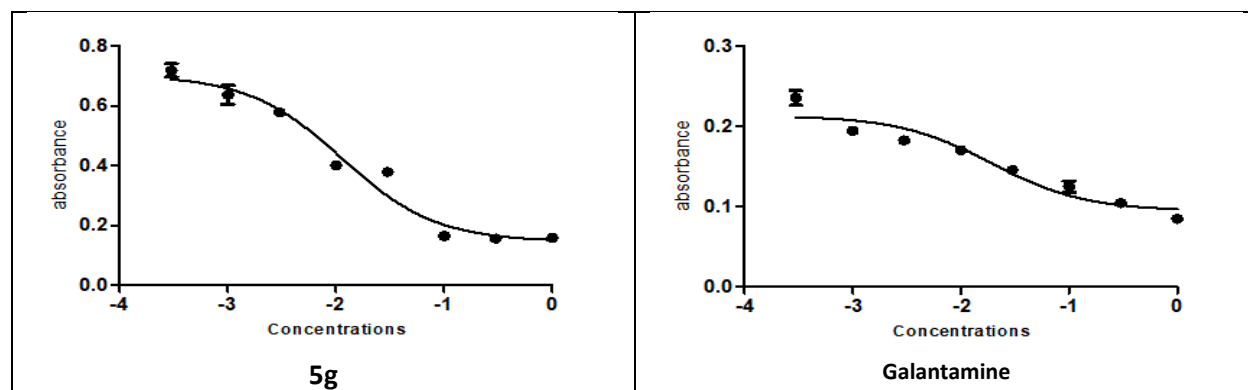

**Figure S2.** Dose response curves for enzyme inhibition activity (BChE)

## *Supporting Information*

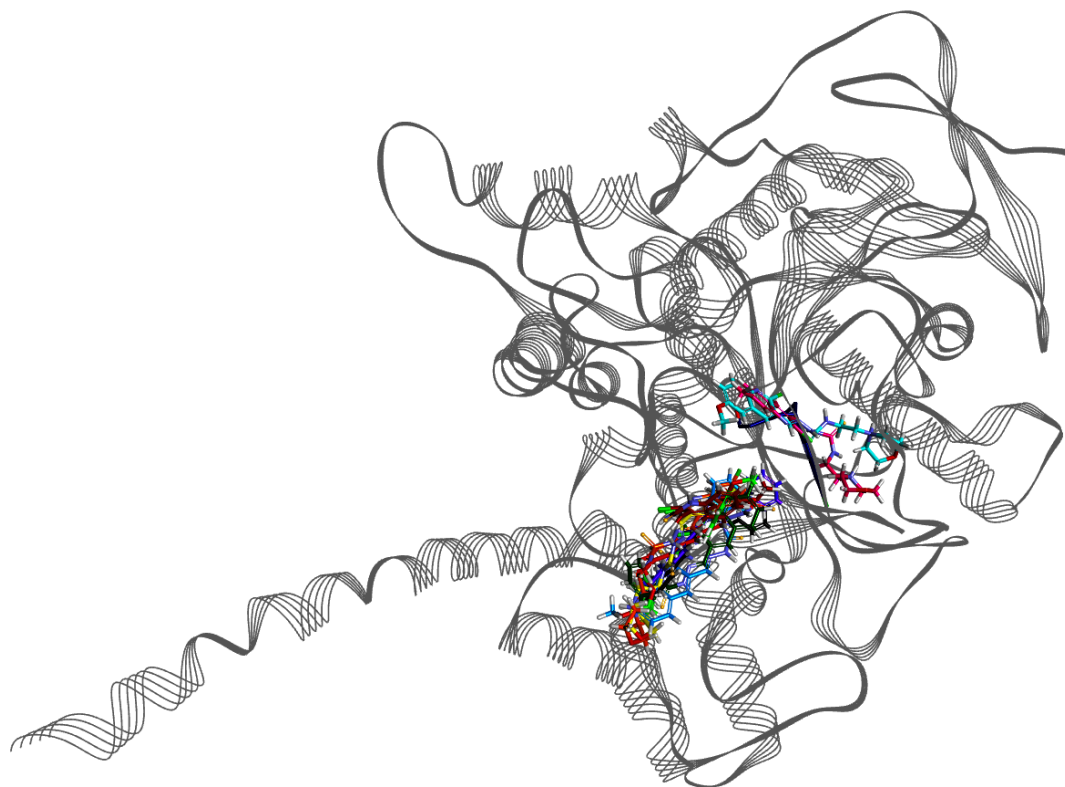

**Figure S3.** An overview of the active site of AChE containing cognate ligand and all the tested compounds.



## Supporting Information

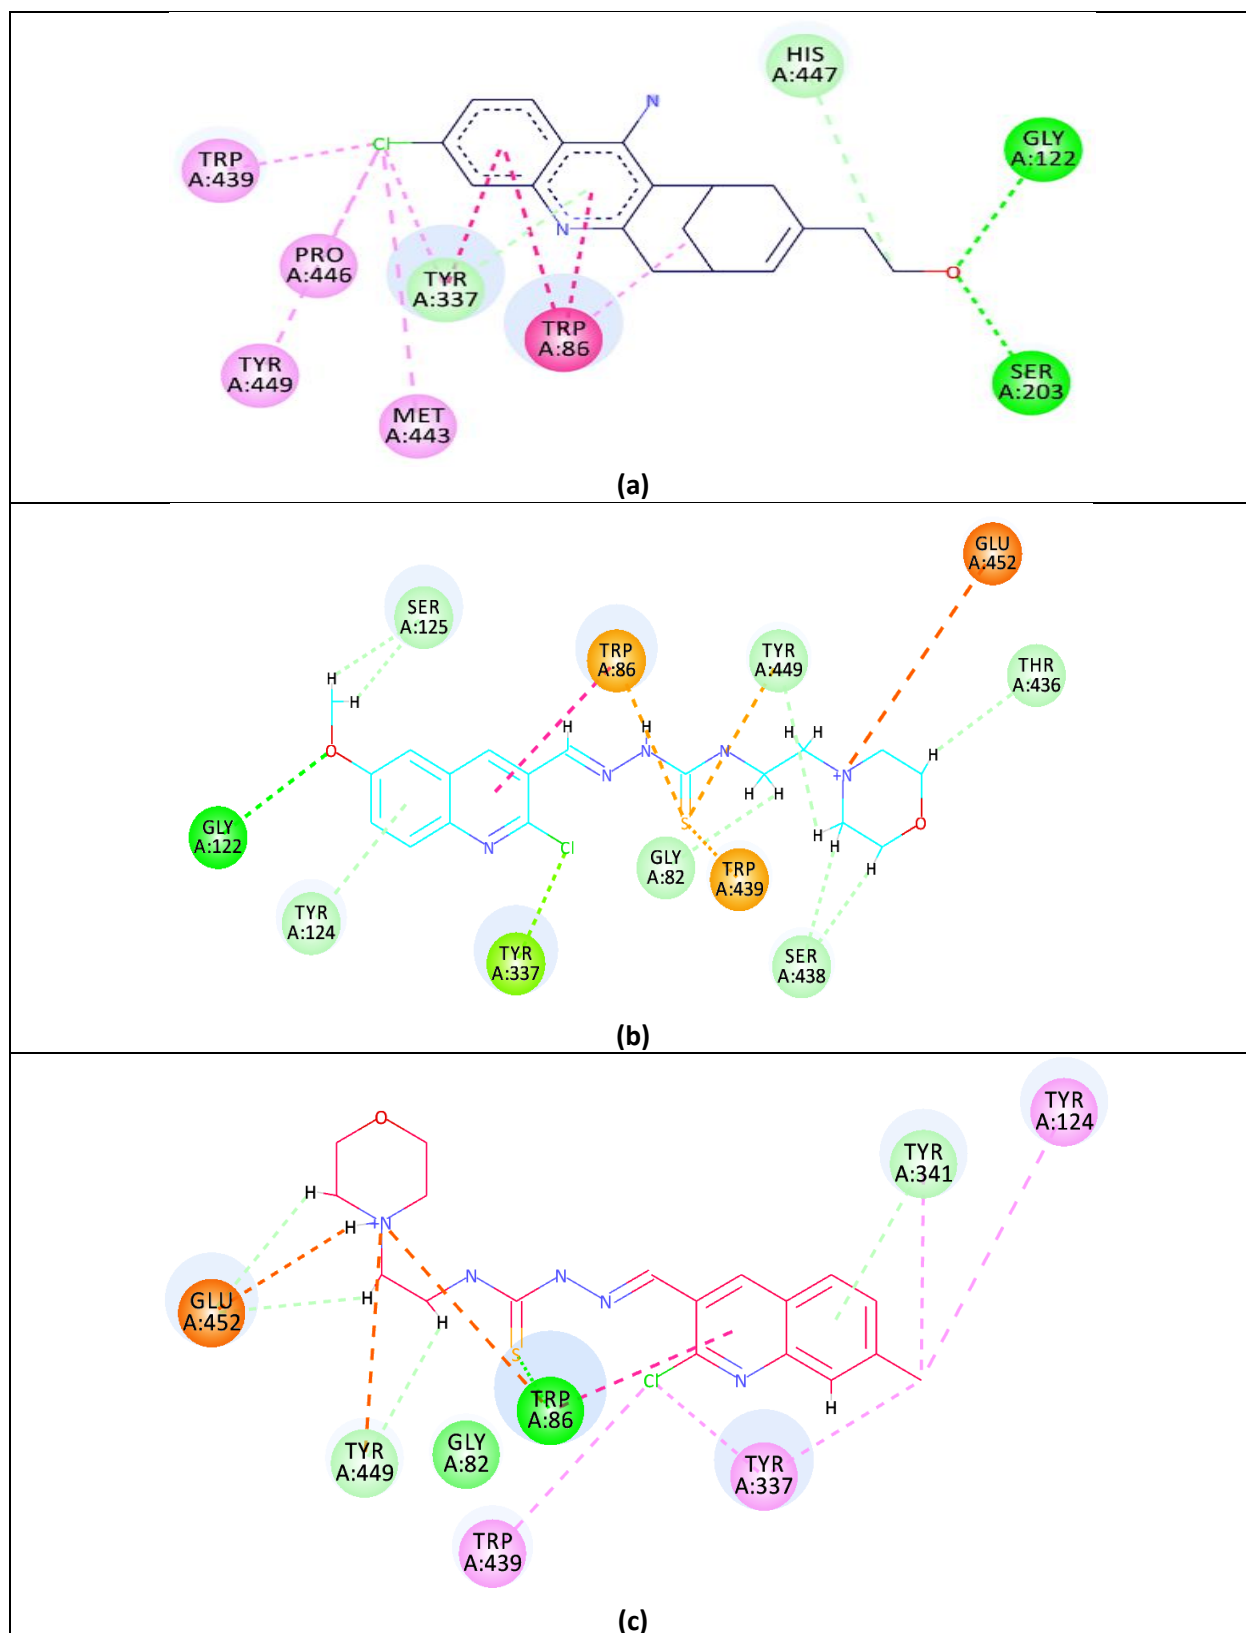

**Figure S4.** 2D interactions of **huprine W** (a), compounds **5b** (b) and **5d** (c) with amino acid residues.

## Supporting Information

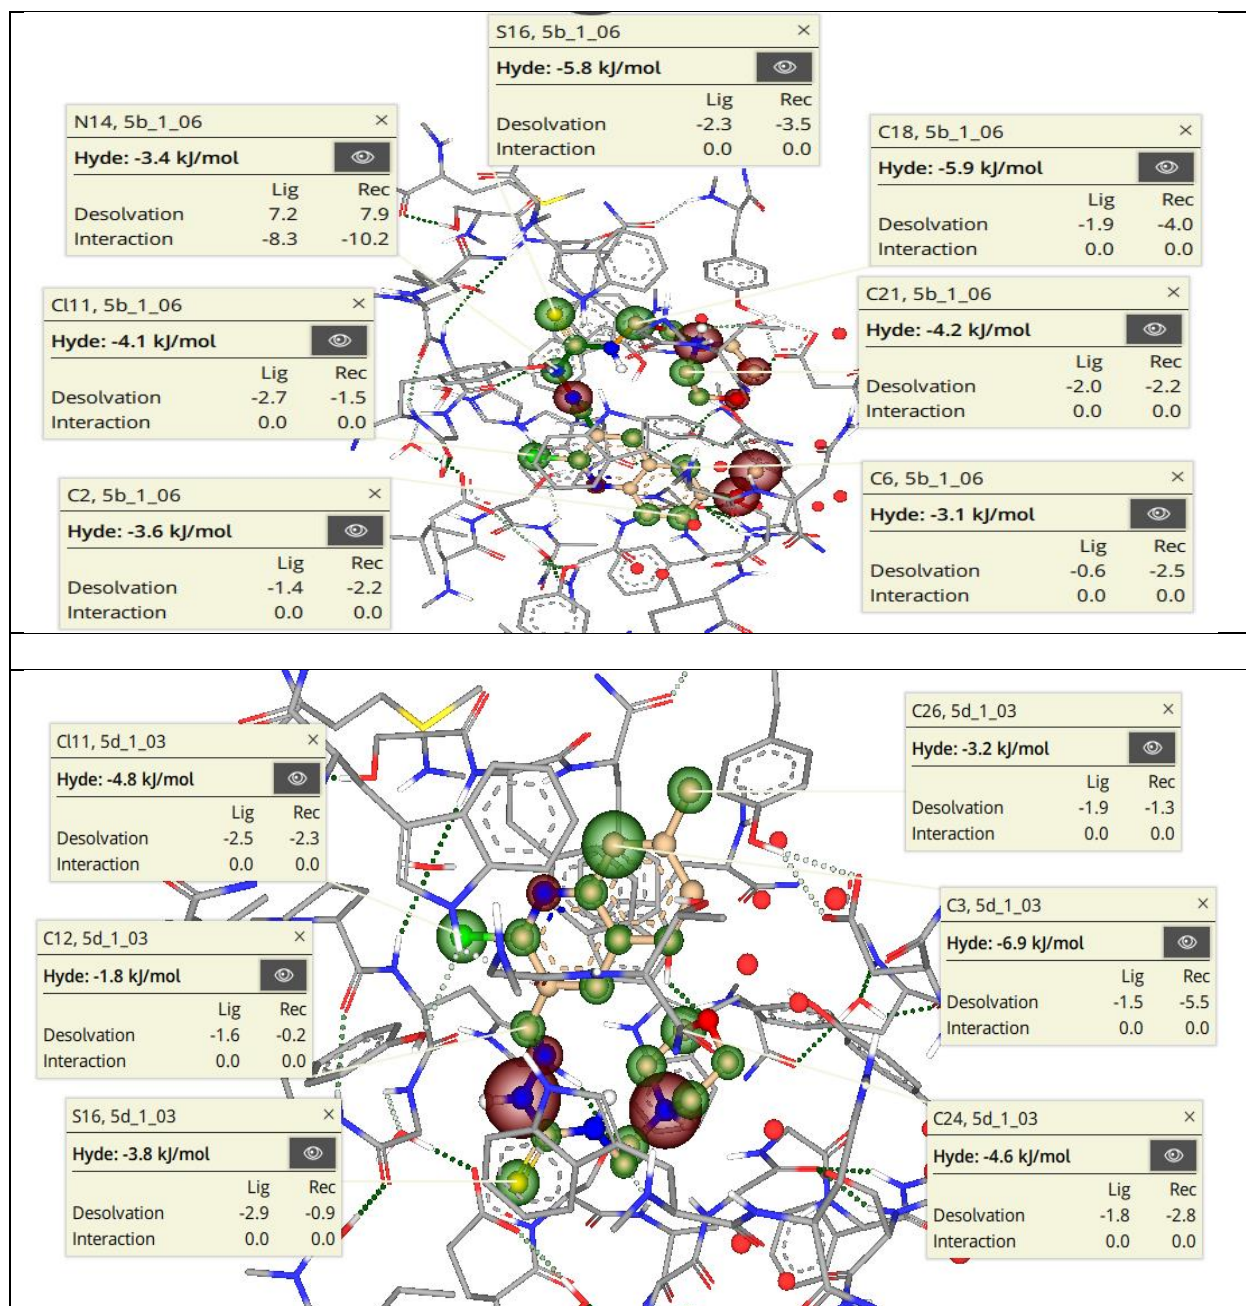

**Figure S5.** Visual and investigative modes of the docked pose of compounds **5b** (above) and **5d** (below) within the active site of AChE.
